# Supplementary material for: Genomics and biochemical analyses reveal a metabolon key to β-L-ODAP biosynthesis in Lathyrus sativus
Source: PubMed Central journal article supplement (PMC9935904; doi:10.1038/s41467-023-36503-2), 2023-02-16
Supplement: 41467_2023_36503_MOESM3_ESM.pdf [file 41467_2023_36503_MOESM3_ESM.pdf]

### **Description of Additional Supplementary Files**

File Name: Supplementary Data 1

Description: Complete phylogeny of BAHD-acyltransferases derived from the LS007 genome assembly, TAIR11 *Arabidopsis thaliana* and the INRA *Pisum sativum v1a* genome assembly

File Name: Supplementary Data 2

Description: Annotations corresponding to gene candidates for enzymes involved in  $\beta$ -L-ODAP synthesis
